# Supplementary material for: Citric-acid dialysate improves the calcification propensity of hemodialysis patients: A multicenter prospective randomized cross-over trial
Source: PubMed Central journal article supplement (PMC6894765; doi:10.1371/journal.pone.0225824), 2019-12-05
Supplement: pone.0225824.s001.pdf [file pone.0225824.s001.pdf]

| Laboratory values            |                                 | A-Ca1.50              | A-Ca1.25              | C-Ca1.50              | P-value#         | Post-hoc (p-value)* |                  |                  |
|------------------------------|---------------------------------|-----------------------|-----------------------|-----------------------|------------------|---------------------|------------------|------------------|
|                              |                                 |                       |                       |                       |                  | 1                   | 2                | 3                |
| <b>Magnesium</b><br>(mmol/l) | <i>Predialysis</i>              | 0.90 [0.83 – 0.95]    | 0.90 [0.82 – 0.97]    | 0.86 [0.79 – 0.91]    | <b>0.001</b>     | 0.27                | <b>0.04</b>      | <b>0.001</b>     |
|                              | <i>Postdialysis</i>             | 0.79 [0.72 – 0.81]    | 0.78 [0.77 – 0.80]    | 0.71 [0.70 – 0.74]    | <b>&lt;0.001</b> | 0.54                | <b>&lt;0.001</b> | <b>&lt;0.001</b> |
|                              | <i>Delta</i>                    | -0.12 [-0.20 - -0.07] | -0.13 [-0.19 - -0.08] | -0.15 [-0.21 - -0.11] | <b>0.005</b>     | 0.65                | <b>0.005</b>     | <b>0.02</b>      |
|                              | <i>Correlation (r; p-value)</i> | 0.13; 0.62            | 0.03; 0.92            | -0.05; 0.86           |                  |                     |                  |                  |
| <b>Fetuin-A</b><br>(mg/ml)   | <i>Predialysis</i>              | 0.39 [0.36 – 0.44]    | 0.38 [0.34 – 0.42]    | 0.40 [0.37 – 0.41]    | 0.40             |                     |                  |                  |
|                              | <i>Postdialysis</i>             | 0.42 [0.38 – 0.44]    | 0.40 [0.37 – 0.42]    | 0.41 [0.39 – 0.43]    | 0.68             |                     |                  |                  |
