# Supplementary material for: Citric-acid dialysate improves the calcification propensity of hemodialysis patients: A multicenter prospective randomized cross-over trial
Source: PubMed Central journal article supplement (PMC6894765; doi:10.1371/journal.pone.0225824), 2019-12-05
Supplement: pone.0225824.s002.pdf [file pone.0225824.s002.pdf]

| T <sub>50</sub> in minutes |                      | A-Ca1.50      | A-Ca1.25         | C-Ca1.50      | P-value <sup>#</sup> | Post-hoc (p-value)* |                  |                  |
|----------------------------|----------------------|---------------|------------------|---------------|----------------------|---------------------|------------------|------------------|
|                            |                      |               |                  |               |                      | 1                   | 2                | 3                |
| <b>Predialysis</b>         | 1 <sup>st</sup>      | 284 [235-346] | 274 [213-308]    | 271 [234-291] | 0.47                 |                     |                  |                  |
|                            | 2 <sup>nd</sup>      | 290 [225-328] | 276 [229-333]    | 282 [244-308] |                      |                     |                  |                  |
|                            | 3 <sup>rd</sup>      | 292 [243-338] | 305 [252-338]    | 288 [258-344] |                      |                     |                  |                  |
|                            | Median`              | 290 [251-326] | 308 [243-337]    | 289 [251-320] |                      |                     |                  |                  |
|                            | p-value <sup>#</sup> | 0.33          | <b>&lt;0.001</b> | <b>0.004</b>  |                      |                     |                  |                  |
| <b>Postdialysis</b>        | 1 <sup>st</sup>      | 349 [316-396] | 280 [322-400]    | 408 [348-455] | <b>&lt;0.001</b>     | 0.13                | <b>&lt;0.001</b> | <b>0.001</b>     |
|                            | 2 <sup>nd</sup>      | 355 [333-400] | 365 [327-417]    | 405 [352-451] |                      |                     |                  |                  |
|                            | 3 <sup>rd</sup>      | 352 [322-407] | 381 [331-407]    | 423 [376-485] |                      |                     |                  |                  |
|                            | Median               | 353 [323-412] | 371[327-413]     | 396 [368-462] |                      |                     |                  |                  |
|                            | p-value <sup>#</sup> | 0.10          | <b>0.01</b>      | 0.27          |                      |                     |                  |                  |
| <b>Delta</b>               | 1 <sup>st</sup>      | 72 {1-97]     | 92 [68-124]      | 121 [86-168]  | <b>&lt;0.001</b>     | 0.23                | <b>&lt;0.001</b> | <b>&lt;0.001</b> |
|                            | 2 <sup>nd</sup>      | 94 [35-122]   | 85 [52-99]       | 115 [92-148]  |                      |                     |                  |                  |
|                            | 3 <sup>rd</sup>      | 53 [19-97]    | 75 [39-99]       | 117 [86-105]  |                      |                     |                  |                  |
|                            | Median               | 66 [34-102]   | 87 [53-108]      | 121 [91-152]  |                      |                     |                  |                  |
|                            | p-value <sup>#</sup> | 0.33          | <b>0.01</b>      | <b>0.02</b>   |                      |                     |                  |                  |
