# Supplementary material for: Citric-acid dialysate improves the calcification propensity of hemodialysis patients: A multicenter prospective randomized cross-over trial
Source: PubMed Central journal article supplement (PMC6894765; doi:10.1371/journal.pone.0225824), 2019-12-05
Supplement: pone.0225824.s003.pdf [file pone.0225824.s003.pdf]

| Laboratory values     |                     | A-Ca1.50                      | A-Ca1.25                      | C-Ca1.50                      | P-value <sup>#</sup> | Post-hoc (p-value)* |                   |      |
|-----------------------|---------------------|-------------------------------|-------------------------------|-------------------------------|----------------------|---------------------|-------------------|------|
|                       |                     |                               |                               |                               |                      | 1                   | 2                 | 3    |
| Phosphate<br>(mmol/l) | <i>Predialysis</i>  | 1.38<br>[1.12-<br>1.62]       | 1.51<br>[1.39-<br>1.59]       | 1.47<br>[1.14-<br>1.60]       | 0.19                 |                     |                   |      |
|                       | <i>Postdialysis</i> | 0.63<br>[0.54-<br>0.75]       | 0.57<br>[0.52-<br>0.67]       | 0.54<br>[0.45-<br>0.67]       | 0.23                 |                     |                   |      |
|                       | <i>Delta</i>        | -0.84 [-<br>0.96 - -<br>0.64] | -0.98 [-<br>1.05 - -<br>0.80] | -0.94 [-<br>1.03 - -<br>0.72] | <b>0.02</b>          | <b>0.00<br/>3</b>   | <b>0.00<br/>5</b> | 0.08 |
|                       | <i>Correlation</i>  | <b>-0.67;<br/>0.002</b>       | -0.37;<br>0.14                | -0.32;<br>0.19                |                      |                     |                   |      |
