# Supplementary material for: Citric-acid dialysate improves the calcification propensity of hemodialysis patients: A multicenter prospective randomized cross-over trial
Source: PubMed Central journal article supplement (PMC6894765; doi:10.1371/journal.pone.0225824), 2019-12-05
Supplement: pone.0225824.s004.pdf [file pone.0225824.s004.pdf]

## **Supplemental File 1: Analysis of carryover and treatment effect**

Due to the use of cross-over design, it is important to evaluate if there is a carryover or treatment effect. These analyses were based on the article of Wellek and Blettner<sup>1</sup>.\*

- Test to check for assumption carryover effects

Within-subject sums (C) is calculated as a sum of “delta T<sub>50</sub> (period 1) + delta T<sub>50</sub> (period 2)”. Unpaired t-test was applied and showed p=0.79.

- Test for differences between treatment differences:

Within-subject differences(D) are determined as “delta T<sub>50</sub> (period 1) - delta T<sub>50</sub> (period 2)”. Unpaired t-test was used and had p<0.001.

With these analyses, we can conclude that there is significant improvement of dCitCa1.50 compared to dAcetCa1.25; no evidence of relevant carryover effects.

**Supplemental Table 1: Overview of delta transition time ( $\Delta T_{50}$ ) in minutes, sorted by sequence**

|                       |          | A-Ca1.25 - C-Ca1.50<br>(N=9) | C-Ca1.50-A-Ca1.25<br>(N=9) |
|-----------------------|----------|------------------------------|----------------------------|
| $\Delta T_{50}$ (min) | A-Ca1.50 | 71±45                        | 55±44                      |
|                       | A-Ca1.25 | 79±38                        | 75±46                      |
|                       | C-Ca1.50 | 123±39                       | 117±33                     |

Note: Data are expressed as mean±SD. A-Ca1.25 = acetic-acid dialysate with calcium concentration (dCa) 1.25mmol/l; A-Ca1.50 = acetic-acid dialysate with dCa 1.50mmol/l; C-Ca1.50 = citric-acid dialysate with dCa 1.50mmol/l.

---

<sup>1</sup> Wellek, S, Blettner, M: On the proper use of the crossover design in clinical trials: part 18 of a series on evaluation of scientific publications. *Dtsch Arztebl Int*, 109: 276-281, 2012.
